# Supplementary material
Source: bioRxiv or medRxiv preprint supplement (https://medrxiv.org/content/medrxiv/early/2020/11/15/2020.11.12.20230318/DC2/embed/media-2.pdf)
Supplement: Supplementary file [file media-2.pdf]

## Appendix 2. Staffing models

**Table 1.** Resource allocation by site

| Sites                                                         | Staff's band/function                                  | Pre-hospital Model |                       | Step-down Model |                       |
|---------------------------------------------------------------|--------------------------------------------------------|--------------------|-----------------------|-----------------|-----------------------|
|                                                               |                                                        | Number of staff    | Total number of hours | Number of staff | Total number of hours |
| <b>Total number of staff involved in setting up the pilot</b> |                                                        |                    |                       |                 |                       |
| Site 1                                                        | band 5, band 8b, band 9                                | 12                 | 770                   | -               | -                     |
| Site 2                                                        | -                                                      | -                  | -                     | 0               | 0                     |
| Site 3                                                        | -                                                      | 0                  | 0                     | -               | -                     |
| Site 4                                                        | GP <sup>1</sup> , ANP <sup>2</sup> , band 5            | 4                  | 27                    | -               | -                     |
| Site 5                                                        | ANP, band 5, band 7, band 9                            | 6                  | 46                    | -               | -                     |
| Site 6                                                        | PA <sup>3</sup> student, ST3 <sup>4</sup> , band 9     | 3                  | 240                   | 1               | 58                    |
| <b>Total number of staff involved in running the pilot</b>    |                                                        |                    |                       |                 |                       |
| Site 1                                                        | band 7                                                 | 1                  | 1,064                 | -               | -                     |
| Site 2                                                        | band 5, band 8, band 9                                 | -                  | -                     | 4               | 2,904                 |
| Site 3                                                        | band 3, band 4, band 8a, band 8d                       | 22                 | 13,577                | -               | -                     |
| Site 4                                                        | GP/ANP                                                 | 9                  | 633                   | -               | -                     |
| Site 5                                                        | ANP band 7, band 9                                     | 22                 | 2,199                 | -               | -                     |
| Site 6                                                        | PA student, band 6 (nurse), ED specialist, ST3, band 2 | 9                  | 21,467                | 2               | 5,148                 |

**Source:** Based on data provided by each site.

**Note:** 1) GP =general practitioners; 2) ANP = advanced nurse practitioners; 3) PA student =students from the faculty of Physician Associates; 4) ST3 = Specialty trainee, third year.

**Table 2.** Staffing models by site

| Sites   | Setting                                                                                                                                                                                                                                     |
|---------|---------------------------------------------------------------------------------------------------------------------------------------------------------------------------------------------------------------------------------------------|
| Site 1. | Secondary care: patients monitored remotely by respiratory nurses<br>Primary care: delivered using federation funded primary care nurses who have worked in the community                                                                   |
| Site 2. | Specialist consultant, a band 8 nurse, Outpatient Parenteral Antibiotic Therapy (OPAT) nurses who were redeployed helped with the calls (during peak also relied on help from specialist respiratory nurses).                               |
| Site 3. | A mix of consultants, cardiologists, five physiotherapists, three physiologists, house officers (largely data collection and completing telephone calls); medical secretaries, and a medical student setting up and monitoring the database |
| Site 4. | Small core team of GP partners, practice manager and ANP; led by senior GP partner                                                                                                                                                          |
| Site 5. | Delivered using three ANPs, senior and junior clinicians, and specialist registrar conducting data collection and analysis.                                                                                                                 |

|         |                                                                                                                                                                                 |
|---------|---------------------------------------------------------------------------------------------------------------------------------------------------------------------------------|
| Site 6  | One ICU consultant, 1 ultrasound fellow, 1 medical student, 4 PAs, admin support and 3 furloughed middle grade ED doctors (from high-risk groups) provided assistance           |
| Site 7. | Pilot lead, staff in the ED (they were able to get involved in the pathway as some of their normal work had been paused), and an ED registrar was involved in phoning patients. |
| Site 8. | Pilot lead and model delivered mainly by nursing staff based in primary care.                                                                                                   |
